# Supplementary material for: Oxidative stress and ROS metabolism via down-regulation of sirtuin 3 expression in Cmah-null mice affect hearing loss
Source: publisher site journal article supplement (doi:10.18632/aging.100800), 2015-08-29
Supplement: Supplementary file [file aging-v7i8-100800-supplementary-material-SD1.pdf]

## SUPPLEMENTARY INFORMATION

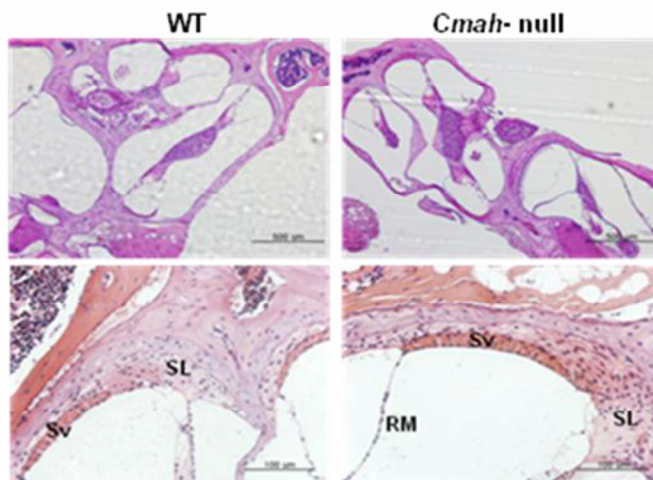

**Supplementary Figure 1.** Histological analysis in inner ear of WT- and *Cmah*-null mouse of 5 week-old. SL: Spiral lamina, Sv: Stria vascularis, RM: Reissner's membrane.

**Supplementary Table 1. Primer sets for neuronal cell marker**

| Genes       | Forward primer       | Reverse primer       | Product (bp) |
|-------------|----------------------|----------------------|--------------|
| <i>Gfap</i> | AGAAAACCGCATCACCATTC | TCACATCACCACGTCCTTGT | 184          |
| <i>Nse</i>  | AGCCCTCATCAGCTCAGGTA | CTGAGCAATGTGGCGATAGA | 184          |
| <i>Nf</i>   | GCCGAAGAGTGGTTCAAGAG | TGTCTGCATTCTGCTTGTCC | 205          |
| <i>Vim</i>  | ATGCTTCTCTGGCACGTCTT | AGCCACGCTTTCATACTGCT | 206          |

**Supplementary Table 2. Primer sets used for identify molecular mechanisms of sirtuins, oxidative stress regulation, and Wnt signaling**

| <b>Genes</b>    | <b>Forward primer</b> | <b>Reverse primer</b> | <b>Product (bp)</b> |
|-----------------|-----------------------|-----------------------|---------------------|
| <i>Sirt3</i>    | TACAGGCCCAATGTCACTCA  | ACAGACCGTGCATGTAGCTG  | 167                 |
| <i>Sirt4</i>    | CGAGCAAAAGCTCCCAATAG  | GTTCATTTCCAGCCTTTGGA  | 151                 |
| <i>Sirt5</i>    | CCCAGAGCCAGAGACTCAAG  | CAGAGGATGTTCCCACCACT  | 191                 |
| <i>Hif1a</i>    | GCAGCAGGAATTGGAACATT  | GCATGCTAAATCGGAGGGTA  | 150                 |
| <i>Foxo3a</i>   | GGGGAGTTTGGTCAATCAGA  | GCCTGAGAGAGAGTCCGAGA  | 193                 |
| <i>Foxo1</i>    | GTGAACACCATGCCTCACAC  | CACAGTCCAAGCGCTCAATA  | 211                 |
| <i>MnSod</i>    | GGCCAAGGGAGATGTTACAA  | CCTTGGACTCCCACAGACAT  | 213                 |
| <i>Lrp5</i>     | GTGTGCAGTTGCAGGACAAT  | CTCCAGGGGATCGTAGTCAA  | 176                 |
| <i>Lrp6</i>     | GACAGACTGGGGAGAAGTGC  | AACGTCAAGGCAAAAGGATG  | 234                 |
| <i>Wnt3a</i>    | ATGGCTCCTCTCGGATACCT  | GGGCATGATCTCCACGTAGT  | 192                 |
| <i>Wnt5a</i>    | CAAATAGGCAGCCGAGAGAC  | CTCTAGCGTCCACGAACTCC  | 217                 |
| <i>Gsk3β</i>    | CAGTGGTGTGGATCAGTTGG  | ATGTGCACAAGCTTCCAGTG  | 232                 |
| <i>Catenine</i> | ACAGGGTGCTATTCCACGAC  | CTGCACAAACAATGGAATGG  | 217                 |
| <i>Cbr1</i>     | AGTGGTGAATGTGTCCAGCA  | CAGGACTGTCACCCCAATCT  | 211                 |
| <i>Imp1</i>     | GGCATCCAAAGAGGTGACAT  | ACATGACCTGTTGGCACGTA  | 155                 |
| <i>Mtfp1</i>    | GCTGTGGTGTGGTTGAGCTA  | ACACAGACGGTTGATGGTGA  | 198                 |
| <i>RhoT2</i>    | CAGTTACCCGCGAGAAGAAG  | GGCTGTCAGCATTCACTTCA  | 240                 |
| <i>CytoC</i>    | TTCCACAACCCTCATGTGAA  | TAAGGGTCCAAAACCAGTGC  | 109                 |
| <i>Soc1</i>     | AGTGGCCTTGAAAGAAAGCA  | GTAGCCTGCCCTTGCTATTG  | 79                  |
| <i>Soc2</i>     | CCTTCGCTGAACTTGTCTC   | CCCTAGAGCCAGTAGCATCG  | 100                 |
| <i>Atpase6</i>  | CCTTCCACAAGGAACTCCAA  | CCTTCCACAAGGAACTCCAA  | 187                 |
| <i>Atp5fl</i>   | TCAGAAGCGCCATTACCTCT  | TTGGCAATGGTCTCCTTTC   | 234                 |
